# Supplementary material for: Validity and reliability of handgrip dynamometry in older adults: A comparison of two widely used dynamometers
Source: PubMed Central journal article supplement (PMC9212147; doi:10.1371/journal.pone.0270132), 2022-06-21
Supplement: pone.0270132.s001.pdf [file pone.0270132.s001.pdf]

| Age | Gender | Height | Wgt#1 | BMI1 | WC    | JamarHG1 | JamarHG2 | SmedHG1 | SmedHG2 |
|-----|--------|--------|-------|------|-------|----------|----------|---------|---------|
| 79  | 1      | 166    | 90    | 32.7 | 114   | 16       | 12       | 14.9    | 14.3    |
| 78  | 1      | 173    | 54.4  | 18.2 | 68    | 18       | 17.5     | 13.7    | 15.2    |
| 75  | 1      | 158    | 57.6  | 23.1 | 81.25 | 28       | 26       | 19.4    | 17      |
| 73  | 1      | 156    | 67.2  | 27.6 | 100   | 34.5     | 32.5     | 32.3    | 31.5    |
| 70  | 1      | 170    | 61    | 21.1 | 66    | 28       | 26       | 24.7    | 22.9    |
| 74  | 1      | 163    | 74.8  | 28.1 | 101   | 20       | 20       | 18.8    | 14.9    |
| 76  | 1      | 163    | 87    | 32.8 | 95.75 | 30       | 24       | 24      | 24.9    |
| 79  | 1      | 165    | 53.2  | 19.5 | 72.5  | 20       | 19       | 14.3    | 10.9    |
| 75  | 2      | 188    | 83.6  | 23.6 | 97    | 52       | 51       | 41.4    | 41.6    |
| 72  | 2      | 185    | 62.2  | 18.1 | 81    | 22.5     | 20       | 21.1    | 20.6    |
| 67  | 2      | 180    | 92.4  | 28.5 | 102.5 | 52       | 52.5     | 41.6    | 44.5    |
| 92  | 2      | 170    | 61.4  | 21.3 | 93    | 30       | 28       | 26.7    | 24.3    |
| 71  | 2      | 183    | 71.8  | 21.5 | 90    | 52       | 52       | 44.3    | 37      |
| 86  | 1      | 161    | 67.6  | 26.1 | 94.5  | 20.5     | 17       | 18.5    | 15.2    |
| 70  | 1      | 163    | 85    | 32   | 102.5 | 15       | 14       | 14      | 15.2    |
| 79  | 2      | 178    | 74.6  | 23.5 | 100   | 44       | 38       | 28      | 29      |
| 71  | 1      | 172    | 75    | 25.3 | 95    | 22       | 24       | 17.2    | 16      |
| 71  | 2      | 185    | 106.6 | 31.2 | 115   | 39       | 38       | 34.1    | 26.4    |
| 77  | 1      | 150    | 61.8  | 27.5 | 89    | 14       | 13       | 10.7    | 10.5    |
| 96  | 1      | 157    | 61.4  | 24.9 | 94.5  | 16       | 15       | 15.8    | 14.6    |
| 65  | 2      | 182    | 79.6  | 24   | 96    | 45       | 43       | 41.6    | 40      |
| 87  | 1      | 162    | 55    | 21   | 79    | 23       | 22       | 21      | 16.7    |
| 81  | 2      | 185    | 93.6  | 27   | 105.5 | 38       | 34       | 35.1    | 34.2    |
| 76  | 1      | 170    | 69.6  | 24.1 | 81.5  | 22       | 20       | 20.8    | 19.7    |
| 77  | 1      | 167    | 71.2  | 25.6 | 93.5  | 6        | 5        | 5.7     | 5.4     |
| 89  | 1      | 159    | 74.4  | 29.4 | 99    | 20       | 21.5     | 22.7    | 21.6    |
| 78  | 1      | 158    | 56.6  | 22.7 | 74    | 19       | 16       | 13.7    | 9.9     |
| 84  | 1      | 152    | 68.6  | 29.7 | 95    | 13       | 12.5     | 8.9     | 10.6    |
| 72  | 1      | 169    | 80.2  | 28.1 | 98    | 28       | 19       | 22.1    | 17.9    |
| 85  | 1      | 152    | 59.2  | 25.7 | 91.5  | 16.5     | 6.5      | 9       | 7.9     |
| 74  | 1      | 168    | 69.6  | 24.6 | 89    | 25       | 23       | 22.9    | 22.7    |
| 65  | 1      | 165    | 60.6  | 22.3 | 87    | 28       | 28       | 17.2    | 19.3    |
| 78  | 1      | 154    | 71    | 29.9 | 98.75 | 18       | 22       | 20.4    | 20      |
| 78  | 1      | 164    | 61.2  | 22.8 | 82    | 21       | 21       | 19.6    | 20.9    |
| 73  | 1      | 163    | 107.8 | 40.6 | 133.5 | 12       | 12       | 11.9    | 8.8     |
| 77  | 2      | 183    | 99    | 29.6 | 119   | 35       | 32       | 25.1    | 28.1    |
| 74  | 1      | 160    | 68.8  | 26.9 | 96.5  | 13       | 13.5     | 16.3    | 14.2    |
| 69  | 1      | 164    | 70.2  | 26.1 | 94.5  | 23       | 17.5     | 16.9    | 9.4     |
| 73  | 2      | 175    | 75.8  | 24.8 | 97    | 29       | 25       | 26      | 20.3    |
| 76  | 1      | 172    | 77    | 26   | 93    | 26       | 22       | 21      | 17.5    |
| 88  | 1      | 156    | 56.8  | 23.4 | 84    | 18       | 18       | 15.2    | 16.7    |
| 65  | 1      | 160    | 56.4  | 22.1 | 81    | 28       | 24       | 21.7    | 21.3    |
| 85  | 2      | 170    | 68.8  | 23.8 | 94.5  | 36       | 36       | 30.7    | 32.1    |
| 74  | 2      | 190    | 84.4  | 23.4 | 98    | 43       | 40       | 38.9    | 34.9    |
| 79  | 2      | 177    | 78.3  | 25   | 103   | 31       | 30       | 32      | 27.6    |
| 70  | 2      | 185    | 85.4  | 25   | 99    | 22.5     | 30       | 14.7    | 25.9    |

|    |   |     |       |      |      |      |      |      |      |
|----|---|-----|-------|------|------|------|------|------|------|
| 70 | 2 | 185 | 95    | 27.8 | 110  | 55   | 56   | 37.6 | 43   |
| 80 | 2 | 170 | 77.6  | 26.9 | 108  | 36   | 39.5 | 30.4 | 32.7 |
| 78 | 2 | 184 | 87.3  | 25.8 | 108  | 46.5 | 44   | 35.2 | 38.9 |
| 72 | 2 | 180 | 71.5  | 22.1 | 90   | 24   | 22   | 24.6 | 19.4 |
| 79 | 2 | 183 | 97.7  | 29.2 | 111  | 28   | 20   | 24   | 26.7 |
| 67 | 2 | 176 | 95.9  | 31   | 98   | 30   | 32   | 21.7 | 20.7 |
| 76 | 2 | 171 | 89.2  | 30.5 | 108  | 23   | 24   | 18.8 | 23.7 |
| 74 | 2 | 179 | 70.9  | 22.1 | 96   | 28   | 22   | 25   | 21.6 |
| 73 | 2 | 174 | 73    | 24.1 | 96   | 36   | 22   | 27.3 | 17   |
| 68 | 2 | 185 | 110.4 | 32.3 | 126  | 10   | 8    | 9.9  | 10.7 |
| 69 | 2 | 180 | 89.3  | 27.6 | 97   | 18   | 12   | 17.6 | 11   |
| 74 | 2 | 178 | 83    | 26.2 | 103  | 22   | 13   | 18.8 | 11   |
| 92 | 2 | 162 | 64.3  | 24.5 | 90   | 41   | 37   | 38.6 | 31.5 |
| 67 | 2 | 179 | 117.7 | 36.7 | 133  | 53.5 | 43   | 42.8 | 38   |
| 69 | 1 | 161 | 60.8  | 23.4 | 81   | 20   | 18   | 13.7 | 12.1 |
| 82 | 2 | 179 | 88.8  | 27.7 | 114  | 26   | 26   | 28.4 | 27.1 |
| 88 | 2 | 178 | 67.7  | 21.4 | 91.5 | 22   | 18.5 | 18.7 | 16.4 |
| 81 | 2 | 183 | 93.1  | 27.8 | 110  | 31.5 | 34   | 32.4 | 33   |
| 78 | 2 | 179 | 94.4  | 29.4 | 112  | 25   | 22   | 28   | 17.9 |
| 77 | 2 | 174 | 68.8  | 22.7 | 93   | 32   | 28   | 28.4 | 23.6 |
| 69 | 1 | 154 | 49.3  | 20.8 | 72   | 18   | 19   | 15.8 | 15.1 |
